# Supplementary material for: Enriched Environment Induces Sex-Specific Changes in the Adult Neurogenesis, Cytokine and miRNA Expression in Rat Hippocampus
Source: MDPI journal article supplement (doi:10.3390/biomedicines11051341), 2023-05-02
Supplement: s1 [file s1]

**Table S1.** Number of animals used in each experimental group.

| Experiment                   | Group                      | Male/Female | Number of Animals |
|------------------------------|----------------------------|-------------|-------------------|
| Open field                   | Before Control (age - P30) | Male        | 8                 |
|                              |                            | Female      | 8                 |
|                              | Before EE (age - P30)      | Male        | 7                 |
|                              |                            | Female      | 6                 |
|                              | Control (age - P90)        | Male        | 24                |
|                              |                            | Female      | 23                |
|                              | EE (age - P90)             | Male        | 27                |
|                              |                            | Female      | 28                |
| Elevated plus maze           | Control (age - P90)        | Male        | 24                |
|                              |                            | Female      | 23                |
|                              | EE (age - P90)             | Male        | 23                |
|                              |                            | Female      | 23                |
| Barnes maze                  | Control (age - P90)        | Male        | 14                |
|                              |                            | Female      | 13                |
|                              | EE (age - P90)             | Male        | 17                |
|                              |                            | Female      | 16                |
| PCR: KI67, DCX, Nestin, BDNF | Control (age - P90)        | Male        | 6                 |
|                              |                            | Female      | 7                 |
|                              | EE (age - P90)             | Male        | 6                 |
|                              |                            | Female      | 5                 |
| PCR: IL-10, IL-10RA          | Control (age - P90)        | Male        | 6                 |
|                              |                            | Female      | 6                 |
|                              | EE (age - P90)             | Male        | 6                 |
|                              |                            | Female      | 5                 |
| PCR: JAK1                    | Control (age - P90)        | Male        | 6                 |
|                              |                            | Female      | 6                 |
|                              | EE (age - P90)             | Male        | 6                 |
|                              |                            | Female      | 5                 |

|                            |                     |        |   |
|----------------------------|---------------------|--------|---|
| PCR: STAT1, STAT5A, STAT5B | Control (age - P90) | Male   | 6 |
|                            |                     | Female | 7 |
|                            | EE (age - P90)      | Male   | 6 |
|                            |                     | Female | 5 |
| PCR: STAT3                 | Control (age - P90) | Male   | 6 |
|                            |                     | Female | 5 |
|                            | EE (age - P90)      | Male   | 6 |
|                            |                     | Female | 5 |
| PCR: microRNA              | Control (age - P90) | Male   | 3 |
|                            |                     | Female | 3 |
|                            | EE (age - P90)      | Male   | 3 |
|                            |                     | Female | 3 |
| Immunohistochemistry       | Control (age - P90) | Male   | 7 |
|                            |                     | Female | 5 |
|                            | EE (age - P90)      | Male   | 7 |
|                            |                     | Female | 5 |

**Table S2.** Changes in mRNA expression in females, reference gene—SNORD61; changes in mRNA expression in females, reference gene—SNORD68; changes in mRNA expression in females, reference gene—SNORD72; changes in mRNA expression in females, reference gene—SNORD95; changes in mRNA expression in females, reference gene—SNORD96A; changes in mRNA expression in females, reference gene—RNU6-6P; changes in mRNA expression in males, reference gene—SNORD61; changes in mRNA expression in males, reference gene—SNORD68; changes in mRNA expression in males, reference gene—SNORD72; changes in mRNA expression in males, reference gene—SNORD95; changes in mRNA expression in males, reference gene—SNORD96A; changes in mRNA expression in males, reference gene—RNU6-6P. The table shows the tested miRNAs and the fold change.

|                |          | Female         | Male           | Female         | Male            | Female         | Male           | Female        | Male | Female        | Male | Female        | Male |
|----------------|----------|----------------|----------------|----------------|-----------------|----------------|----------------|---------------|------|---------------|------|---------------|------|
|                |          | rno-let-7a-5p  | rno-miR-7a-5p  | rno-let-7i-5p  | rno-miR-10b-5p  | rno-miR-18a-5p | rno-miR-20a-5p |               |      |               |      |               |      |
| Reference Gene | SNORD61  | -              | -              | -              | -               | -              | -              | -             | -    | -             | -    | -             | -    |
|                | SNORD68  | 0.50/<br>0.004 | -              | -              | -               | -              | -              | -             | -    | -             | -    | -             | -    |
|                | SNORD72  | -              | -              | -              | -               | -              | -              | 1.74/<br>0.03 | -    | -             | -    | -             | -    |
|                | SNORD95  | -              | -              | 2.16/<br>0.02  | -               | 1.56/<br>0.006 | -              | 1.55/<br>0.02 | -    | 2.28/<br>0.02 | -    | 1.99/<br>0.02 | -    |
|                | SNORD96A | -              | -              | -              | -               | -              | -              | -             | -    | -             | -    | -             | -    |
|                | RNU6-6P  | -              | -              | -              | -               | -              | -              | -             | -    | -             | -    | -             | -    |
|                |          | Female         | Male           | Female         | Male            | Female         | Male           | Female        | Male | Female        | Male | Female        | Male |
|                |          | rno-miR-26a-5p | rno-miR-99a-5p | rno-miR-103-3p | rno-miR-125a-5p | rno-miR-132-3p | rno-miR-134-5p |               |      |               |      |               |      |

|                |          |               |   |   |               |               |   |                |   |                |   |                |   |
|----------------|----------|---------------|---|---|---------------|---------------|---|----------------|---|----------------|---|----------------|---|
| Reference Gene | SNORD61  | -             | - | - | -             | -             | - | -              | - | -              | - | -              | - |
|                | SNORD68  | 0.51/<br>0.04 | - | - | -             | -             | - | 0.63/<br>0.001 | - | -              | - | -              | - |
|                | SNORD72  | -             | - | - | -             | -             | - | -              | - | -              | - | -              | - |
|                | SNORD95  | -             | - | - | 2.34/<br>0.03 | 1.54/<br>0.02 | - | -              | - | 1.88/<br>0.009 | - | 1.82/<br>0.005 | - |
|                | SNORD96A | -             | - | - | -             | -             | - | -              | - | -              | - | -              | - |
|                | RNU6-6P  | -             | - | - | -             | -             | - | -              | - | -              | - | -              | - |

|                |          | Female         | Male          | Female         | Male          | Female          | Male          | Female         | Male | Female         | Male          | Female         | Male          |
|----------------|----------|----------------|---------------|----------------|---------------|-----------------|---------------|----------------|------|----------------|---------------|----------------|---------------|
|                |          | rno-miR-141-3p |               | rno-miR-144-3p |               | rno-miR-146a-5p |               | rno-miR-185-5p |      | rno-miR-192-5p |               | rno-miR-194-5p |               |
| Reference Gene | SNORD61  | -              | 1.36/<br>0.03 | -              | 0.21/<br>0.04 | -               | -             | -              | -    | -              | -             | -              | -             |
|                | SNORD68  | -              | -             | -              | -             | -               | -             | -              | -    | -              | -             | -              | -             |
|                | SNORD72  | -              | -             | -              | -             | 1.29/<br>0.01   | 1.56/<br>0.01 | -              | -    | -              | -             | -              | -             |
|                | SNORD95  | -              | 1.95/<br>0.02 | -              | -             | -               | -             | 1.77/<br>0.01  | -    | -              | 1.21/<br>0.02 | -              | 1.46/<br>0.02 |
|                | SNORD96A | -              | -             | -              | -             | -               | -             | -              | -    | -              | -             | -              | -             |
|                | RNU6-6P  | -              | -             | -              | -             | -               | -             | -              | -    | -              | -             | -              | -             |

|                |          | Female          | Male | Female         | Male | Female         | Male | Female          | Male | Female         | Male          |
|----------------|----------|-----------------|------|----------------|------|----------------|------|-----------------|------|----------------|---------------|
|                |          | rno-miR-203a-3p |      | rno-miR-205    |      | rno-miR-214-3p |      | rno-miR-218a-5p |      | rno-miR-451-5p |               |
| Reference Gene | SNORD61  | -               | -    | 0.5/<br>0.040  | -    | -              | -    | -               | -    | 0.34/<br>0.02  | 0.11/<br>0.02 |
|                | SNORD68  | -               | -    | -              | -    | -              | -    | -               | -    | 0.31/<br>0.008 | 2.77/<br>0.04 |
|                | SNORD72  | -               | -    | -              | -    | -              | -    | -               | -    | -              | 0.14/<br>0.02 |
|                | SNORD95  | 1.86/<br>0.01   | -    | -              | -    | 1.84/<br>0.02  | -    | 1.68/<br>0.01   | -    | -              | 0.16/<br>0.04 |
|                | SNORD96A | -               | -    | -              | -    | -              | -    | -               | -    | -              | 0.15/<br>0.03 |
|                | RNU6-6P  | -               | -    | 0.63/<br>0.003 | -    | -              | -    | -               | -    | -              | -             |
